# Supplementary material for: Zirconium–Beta zeolite as a robust catalyst for the transformation of levulinic acid to γ-valerolactone via Meerwein–Ponndorf–Verley reduction
Source: Royal Society of Chemistry journal article supplement (doi:10.1039/c4ra01120a), 2014-01-01
Supplement: c4ra01120a1.pdf [file c4ra01120a1.pdf]

## Supplementary Information

### **Zirconium-Beta zeolite as a robust catalyst for the transformation of levulinic acid to $\gamma$ -valerolactone via Meerwein-Ponndorf-Verley reduction**

**Jie Wang,<sup>a</sup> Stephan Jaenicke<sup>a</sup> and Gaik-Khuan Chuah<sup>\*a</sup>**

*<sup>a</sup>Department of Chemistry, National University of Singapore,*

*3 Science Drive 3, Kent Ridge, Singapore 117543*

*Fax: +65 6779 1691; Tel: +65 6516 2839; E-mail: [chmcgk@nus.edu.sg](mailto:chmcgk@nus.edu.sg)*

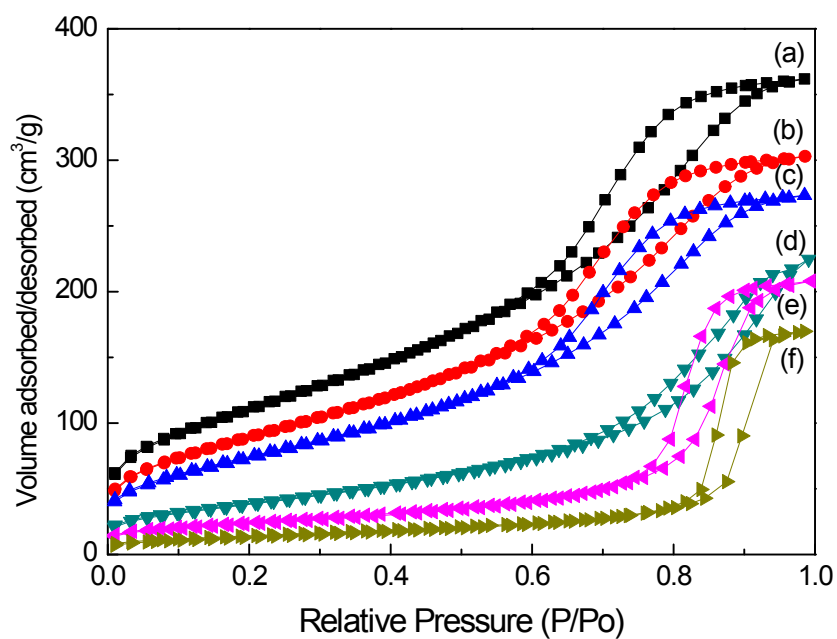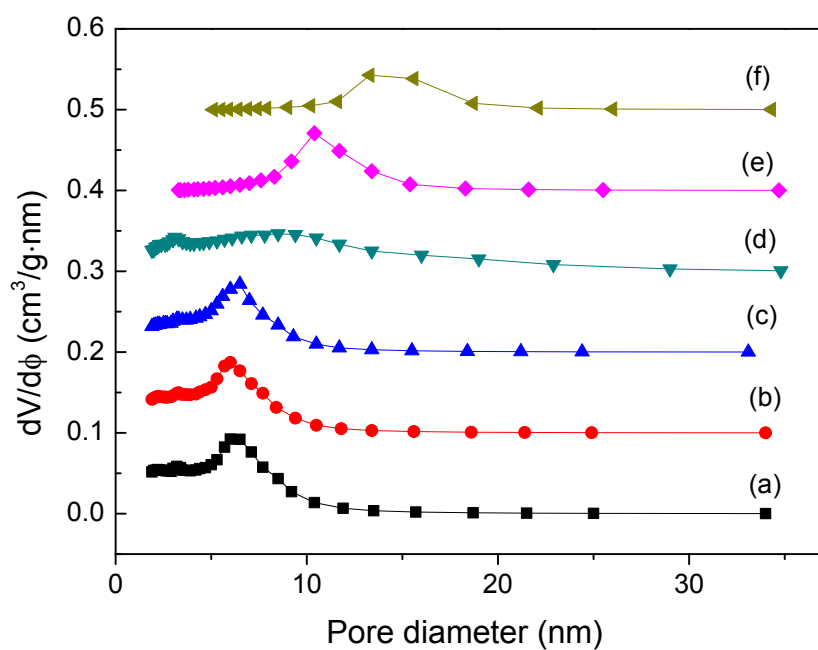

**Fig. S1** N<sub>2</sub> adsorption/desorption isotherms and pore distributions of (a) ZrO(OH)<sub>n</sub>-100 (b) ZrO(OH)<sub>n</sub>-200 (c) ZrO(OH)<sub>n</sub>-300 (d) ZrO(OH)<sub>n</sub>-400 (e) ZrO(OH)<sub>n</sub>-500 and (f) ZrO(OH)<sub>n</sub>-600. The pore size distribution curves are offset by 0.1

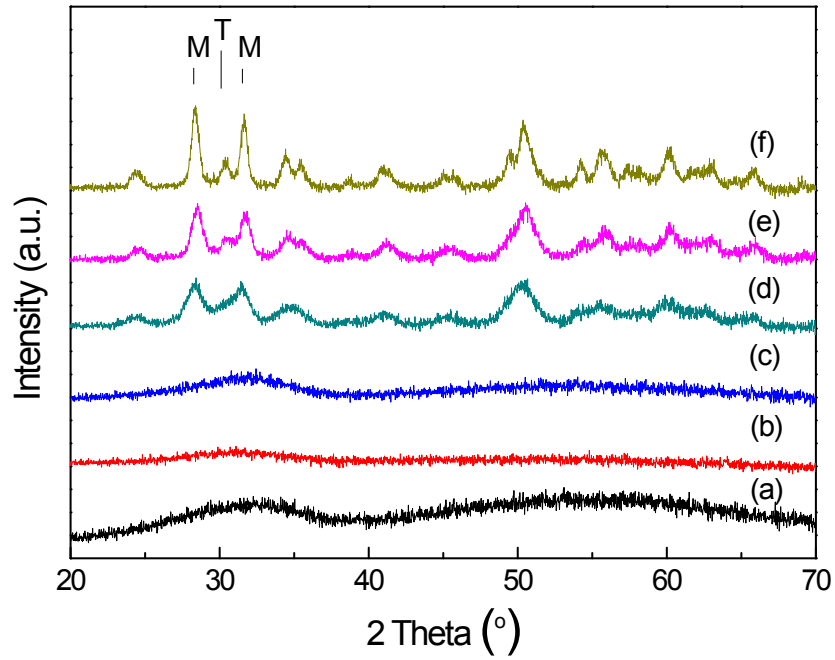

**Fig. S2** X-ray diffraction patterns of (a)  $\text{ZrO}(\text{OH})_n$ -100 (b)  $\text{ZrO}(\text{OH})_n$ -200 (c)  $\text{ZrO}(\text{OH})_n$ -300 (d)  $\text{ZrO}(\text{OH})_n$ -400 (e)  $\text{ZrO}(\text{OH})_n$ -500 and (f)  $\text{ZrO}(\text{OH})_n$ -600. The percentage of monoclinic phase (M %) in the crystallized zirconia was measured according to the equation:<sup>[S1]</sup>  $\% \text{ M} = 1.6I_M / (1.6I_M + I_T)$ , where  $I_M$  and  $I_T$  are the integrated intensities of the monoclinic ( $11\bar{1}$ ) ( $2\theta = 28.5^\circ$ ) and tetragonal (111) ( $2\theta = 30.4^\circ$ ) reflexes, respectively.

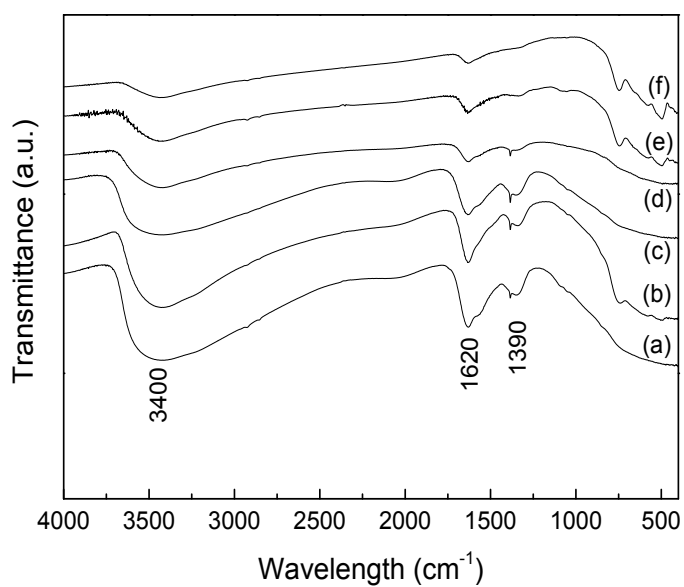

**Fig. S3** FT-IR spectra of (a) ZrO(OH)<sub>n</sub>-100 (b) ZrO(OH)<sub>n</sub>-200 (c) ZrO(OH)<sub>n</sub>-300 (d) ZrO(OH)<sub>n</sub>-400 (e) ZrO(OH)<sub>n</sub>-500 and (f) ZrO(OH)<sub>n</sub>-600. The band at *ca.* 1390 cm<sup>-1</sup> due to atmospheric CO<sub>2</sub> adsorbed on the sample forming a bicarbonate-like species.

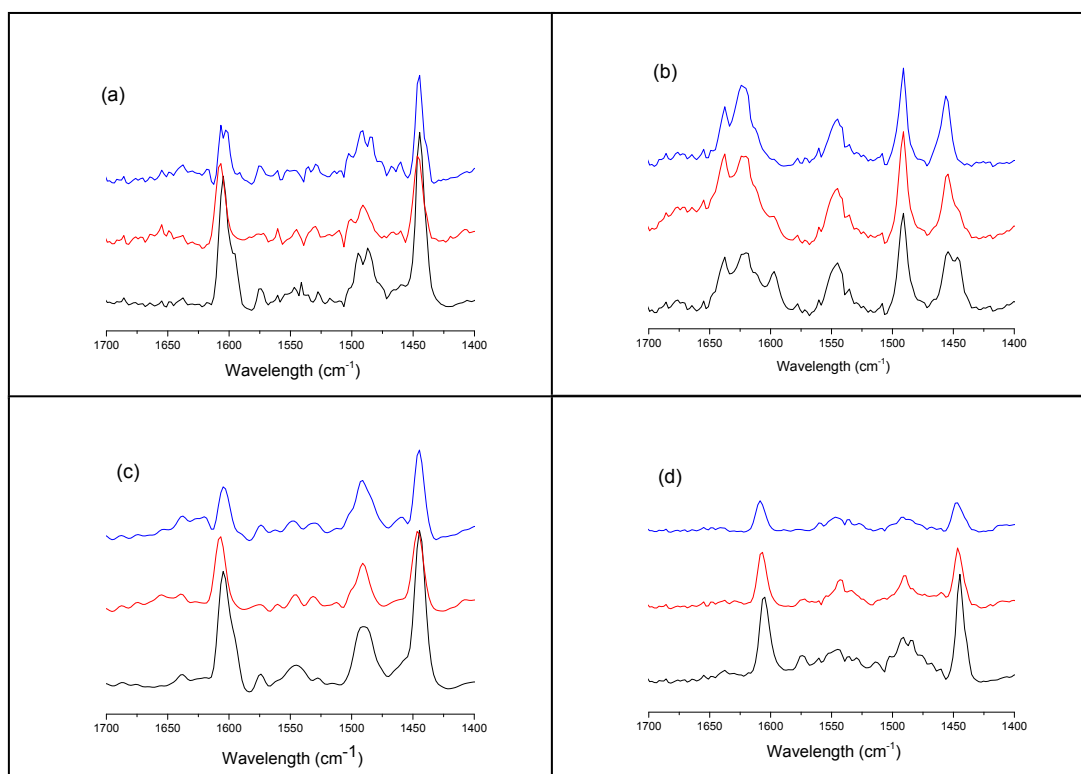

**Fig. S4** Pyridine IR spectra of (a) Zr-Beta-100 (b) ZrAl-Beta-25 (c) ZrO(OH)<sub>n</sub>-300 and (d) ZrO(OH)<sub>n</sub>-400 after evacuation at 100 °C (—), 200 °C (—) and 300 °C (—).

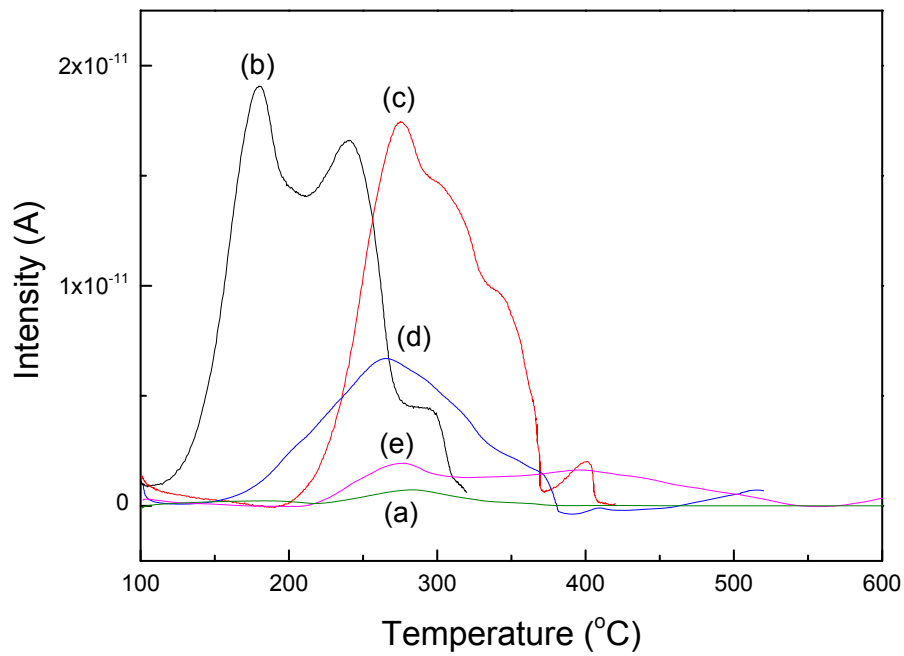

**Fig. S5** CO<sub>2</sub>-TPD profiles for: (a) Zr-Beta-100 (b) ZrO(OH)<sub>n</sub>-300 (c) ZrO(OH)<sub>n</sub>-400 (d) ZrO(OH)<sub>n</sub>-500 (e) ZrO(OH)<sub>n</sub>-600.

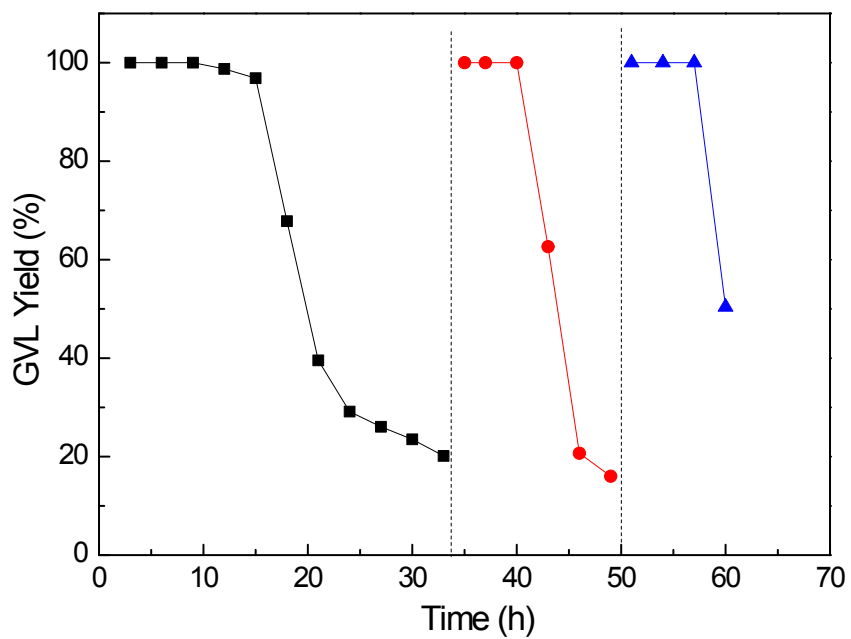

**Fig. S6** Yield of GVL versus time-on-stream for the MPV of LA over Zr-Beta-100 at 150 °C in a continuous flow reactor with WHSV = 0.16 h<sup>-1</sup>. Catalyst was regenerated at 34 h and 50 h by *in-situ* calcination in air at 500 °C for 3 h.

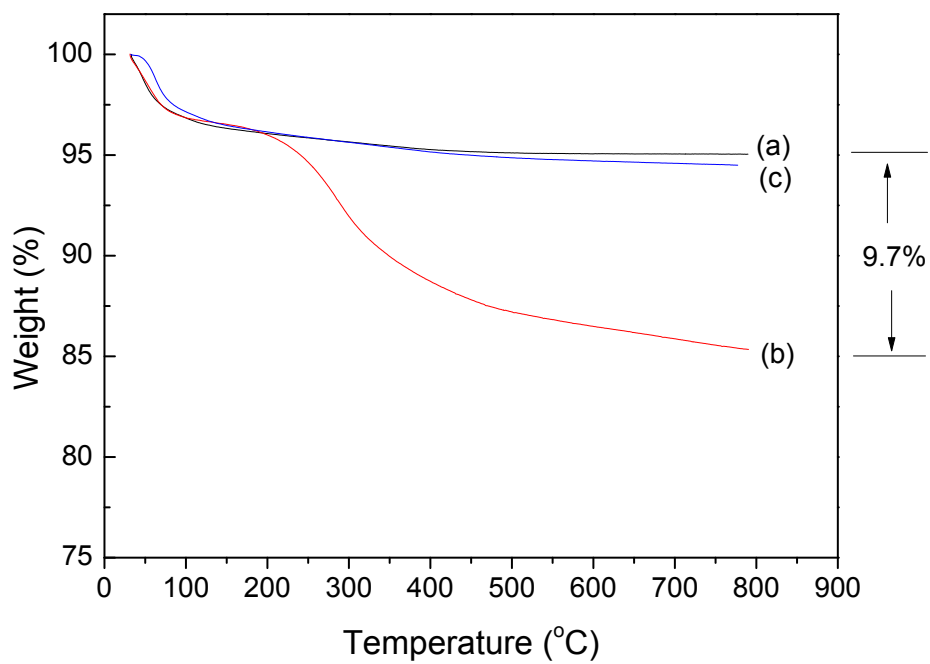

**Fig. S7** Thermogravimetry of (a) fresh Zr-Beta-100 (b) Zr-Beta-100 after 34 h of reaction at 150 °C and (c) regenerated Zr-Beta-100.



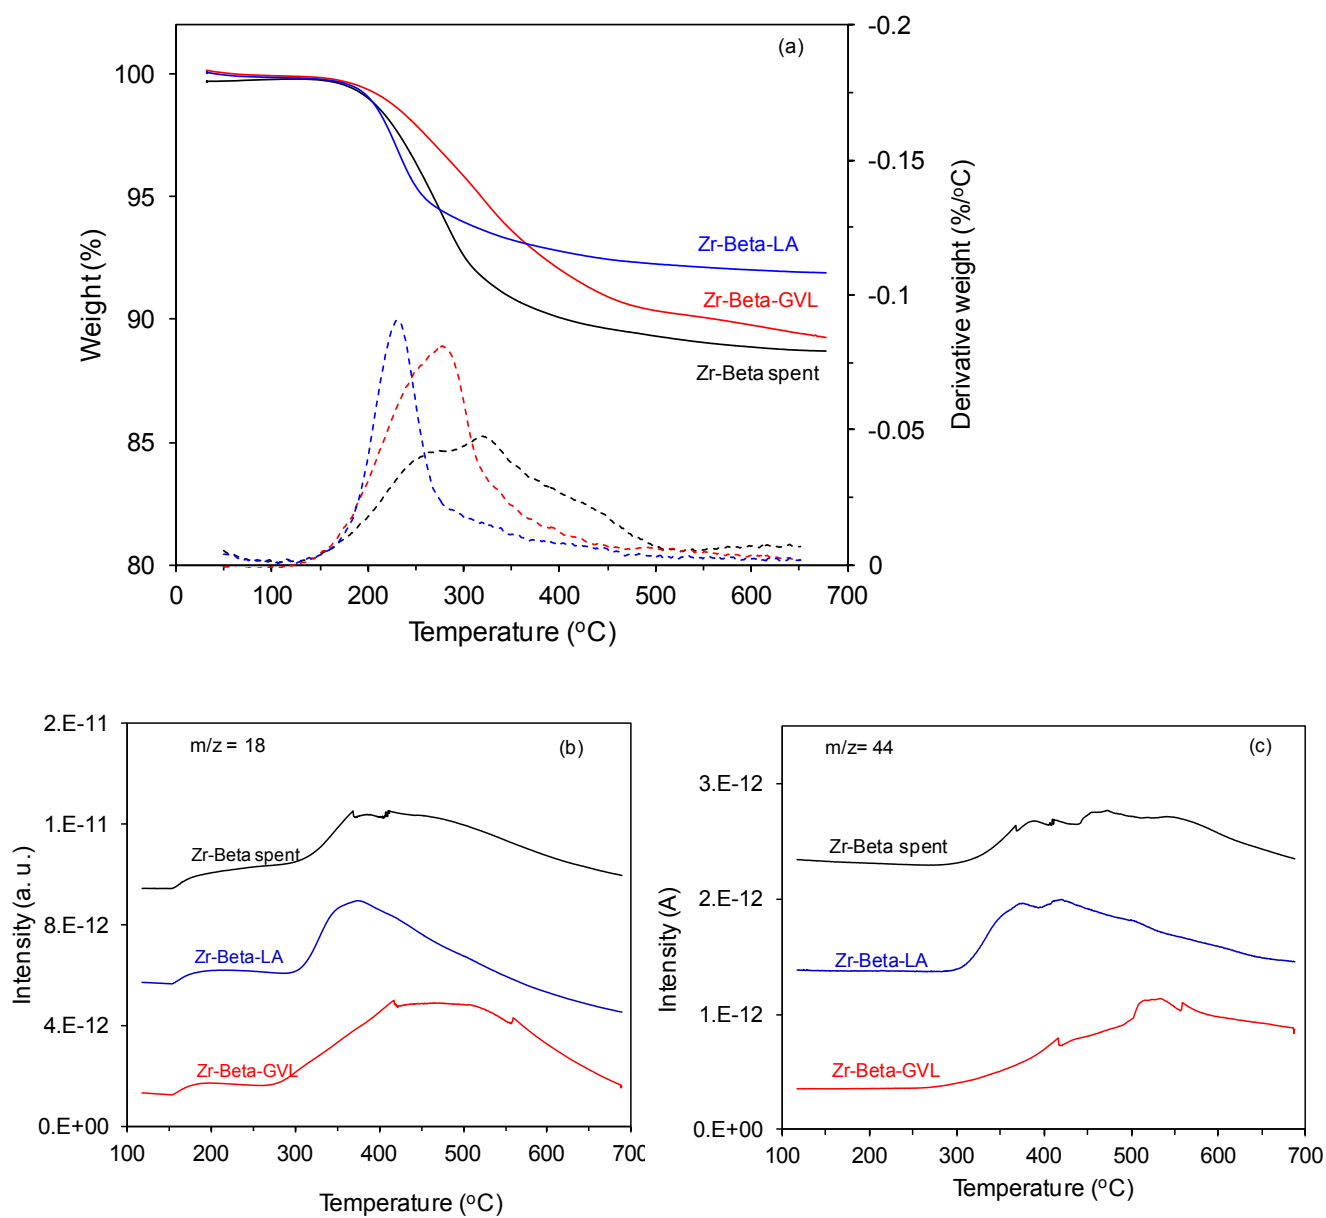

**Fig. S8** TGA-MS results of (a) weight loss (b) H<sub>2</sub>O signal (m/e 18) and (c) CO<sub>2</sub> signal (m/e 44) for spent Zr-Beta (—), Zr-Beta adsorbed with pure levulinic acid (—) and Zr-Beta adsorbed with pure  $\gamma$ -valerolactone (—). The calculated H/C ratios are 1.57,

1.63 and 1.60, respectively. The theoretical H/C ratio for levulinic acid and  $\gamma$ -

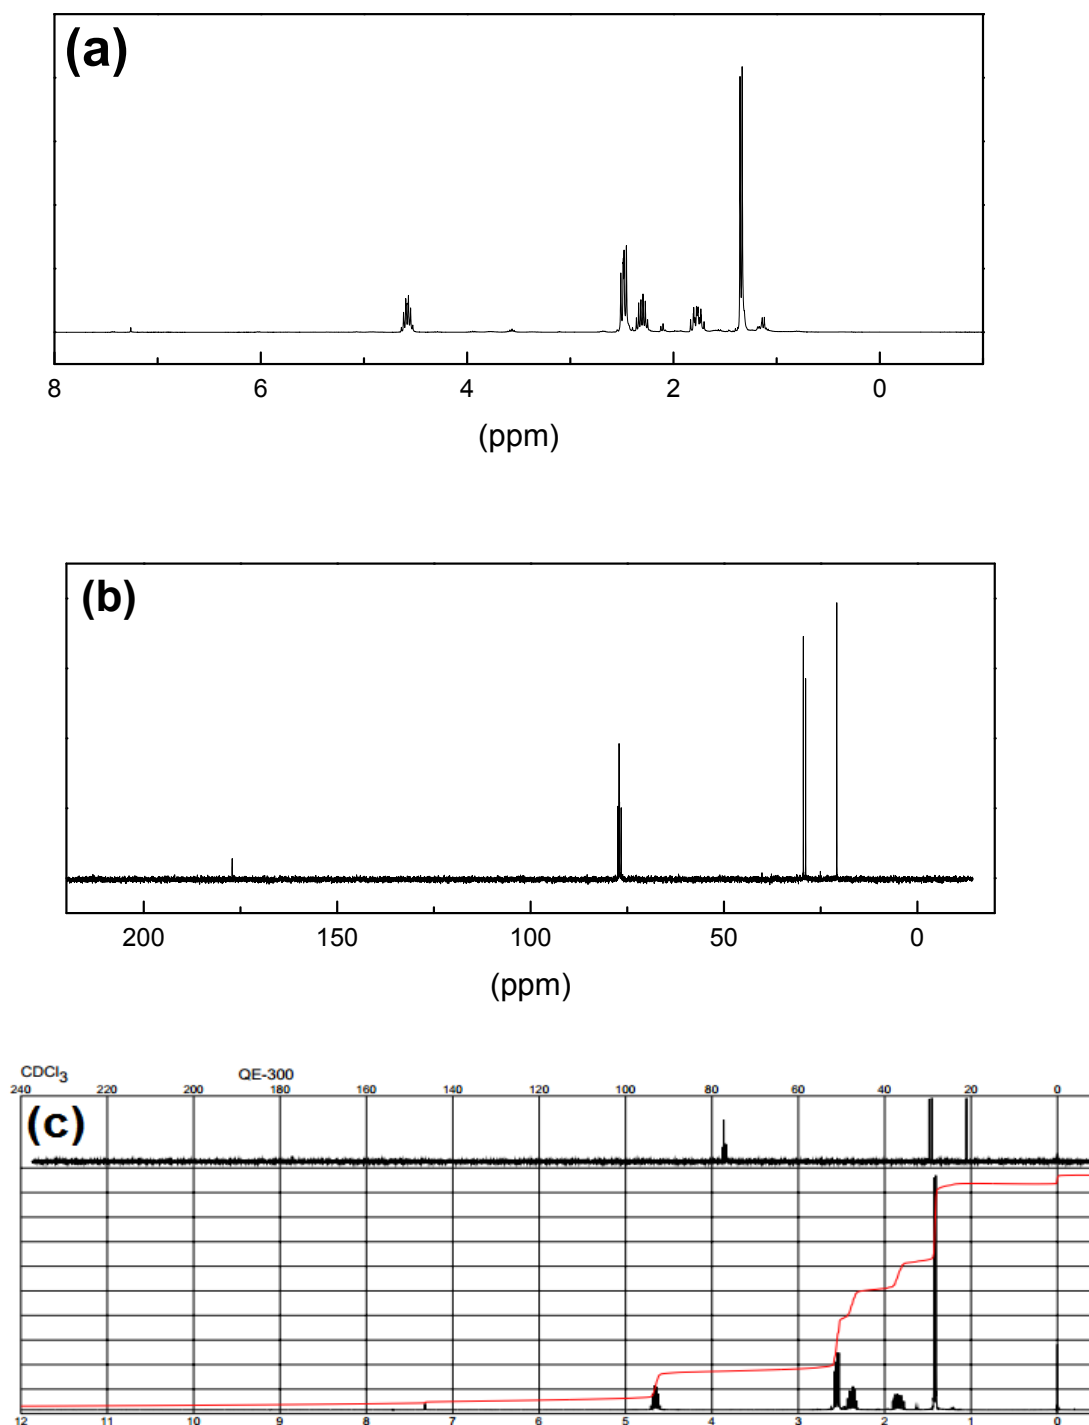

valerolactone are 1.60.

**Fig. S9** (a)  $^1\text{H}$  and (b)  $^{13}\text{C}$  NMR profiles for the isolated GVL. Comparison with  $^1\text{H}$  from(c) standard PDF file

<http://www.sigmaaldrich.com/spectra/fnmr/FNMR011623.PDF>) supplied by Sigma-Aldrich. For further information of NMR for levulinic acid and possible by-products, please refer to literature S2, S3.

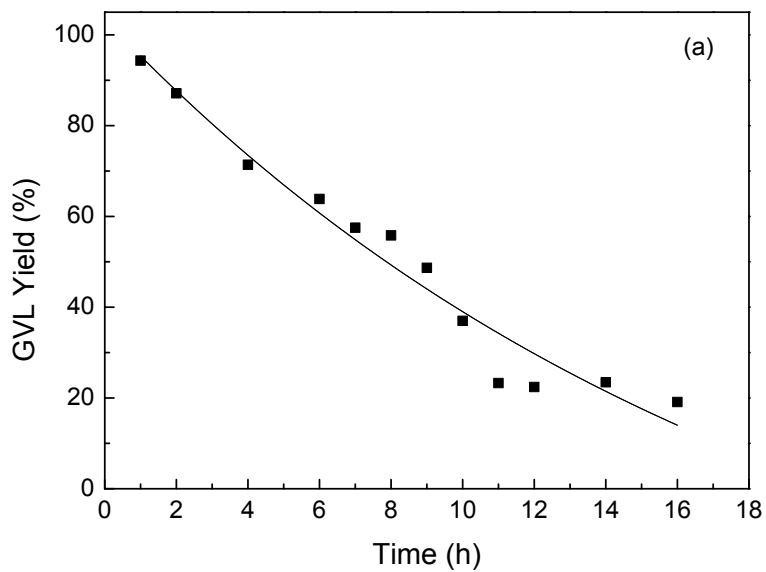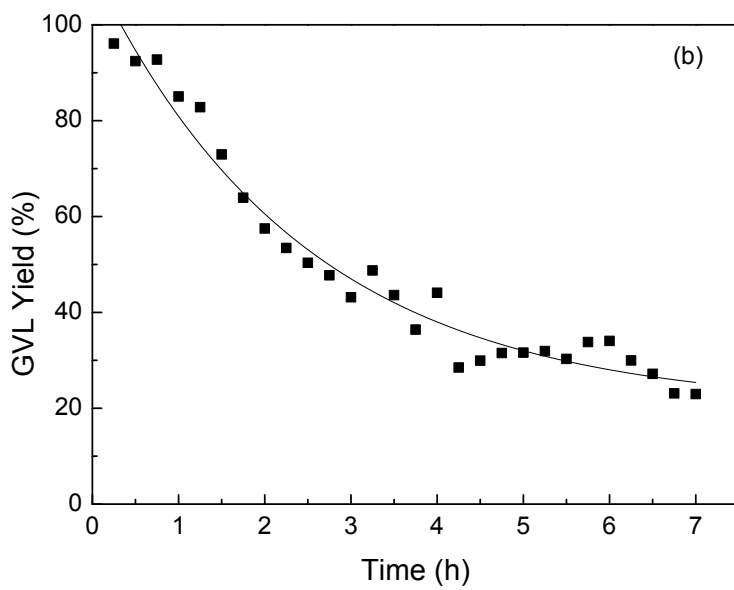

**Fig. S10** Yield of GVL versus time-on-stream over Zr-Beta-100 at 250 °C in a continuous flow reactor at a high WHSV of (a) 2.0 h<sup>-1</sup> and (b) 4.0 h<sup>-1</sup>

**Table S1** MPV over Zr-Beta-100 with different concentration of levulinic acid.

| Catalyst (mg) | LA (mmol) | 2-Pentanol (mL) | LA conc. (wt. %) | Temp. (°C) | Time (h) | Conv. (%) | GVL sel. (%) |
|---------------|-----------|-----------------|------------------|------------|----------|-----------|--------------|
| 200           | 1         | 2               | 7.2              | 118        | 6        | 82        | 77           |
|               |           |                 |                  |            | 8        | 100       | 75           |
| 200           | 1         | 4               | 3.6              | 118        | 6        | 59        | 94           |
| 200           | 1         | 5               | 2.9              | 118        | 6        | 46        | 98           |
| 200           | 1         | 10              | 1.4              | 118        | 6        | 38        | 100          |

**Table S2** Esterification of different concentration of levulinic acid without catalyst after 4 h

| LA (mmol) | 2-Pentanol (mL) | LA conc. (wt. %) | T (°C) | Conv. (%) | Ester Sel. (%) | Yield (%) |
|-----------|-----------------|------------------|--------|-----------|----------------|-----------|
| 1         | 2               | 7.2              | 118    | 11        | 85             | 9.4       |
| 1         | 4               | 3.6              | 118    | 5.2       | 91             | 4.7       |
| 1         | 5               | 2.9              | 118    | 4.6       | >99            | 4.6       |
| 1         | 10              | 1.4              | 18     | 3.1       | >99            | 3.1       |

**References:**

- [S1] D. L. Porter, A. H. Heuer, *J. Am. Ceram. Soc.*, 1979, **62**, 298.  
[S2] H. Mehdi, V. Fábos, R. Tuba, A. Bodor, L. T. Mika and I. T. Horváth, *Top. Catal.*, 2008, **48**, 49-54.  
[S3] J. M. Tukacs, D. Király, A. Strádi, G. Novodarszki, Z. Eke, G. Dibó, T. Kégl and L. T. Mika, *Green Chem.*, 2012, **14**, 2057-2065.
